# Supplementary material for: The Dirac half-semimetal and quantum anomalous Hall effect in two-dimensional Janus Mn2X3Y3 (X, Y = F, Cl, Br, I)
Source: Royal Society of Chemistry journal article supplement (doi:10.1039/d1cp02000e), 2021-01-01
Supplement: d1cp02000e1.pdf [file d1cp02000e1.pdf]

## Supporting information for “The Dirac half-semimetal and quantum anomalous Hall effect in two-dimensional Janus $\text{Mn}_2\text{X}_3\text{Y}_3$ ( $\text{X}, \text{Y} = \text{F}, \text{Cl}, \text{Br}, \text{I}$ )”

Ping Li<sup>1,2,\*</sup> and Zhi-Xin Guo<sup>1,†</sup>

<sup>1</sup>*State Key Laboratory for Mechanical Behavior of Materials,  
Center for Spintronics and Quantum System, School of Materials Science and Engineering,  
Xi'an Jiaotong University, Xi'an, Shaanxi, 710049, China*

<sup>2</sup>*Key Laboratory for Computational Physical Sciences (Ministry of Education), Fudan University, Shanghai, 200433, China*

### **This file contains:**

1. Table SI the different magnetic configuration of the total energy.
2. Figure S1 the total energy fluctuation of the  $\text{Mn}_2\text{X}_3\text{Y}_3$  during the MD simulation at 300 K.
3. Figure S2 the phonon dispersion curves of the  $\text{Mn}_2\text{Cl}_3\text{Br}_3$ .
4. Figure S3 the calculated spin-polarized band structures of  $\text{Mn}_2\text{F}_3\text{Br}_3$ ,  $\text{Mn}_2\text{F}_3\text{I}_3$ , and  $\text{Mn}_2\text{Cl}_3\text{I}_3$ .
5. Figure S4 the energy and k contribution of  $\text{Mn}_2\text{Cl}_3\text{Br}_3$  to the spin up bands.

---

\* pli@xjtu.edu.cn

† zxguo08@xjtu.edu.cn

TABLE S1. Different magnetic configuration of the total energy E (meV/cell) (relative to the FM state).

|                                     | FM   | AFM-N  | AFM-ZZ | AFM-C-I | AFM-C-II | AFM-C-III |
|-------------------------------------|------|--------|--------|---------|----------|-----------|
| $\text{Mn}_2\text{F}_3\text{Cl}_3$  | 0.00 | 295.68 | 340.53 | 381.75  | 521.53   | 428.99    |
| $\text{Mn}_2\text{F}_3\text{Br}_3$  | 0.00 | 314.88 | 428.90 | 572.70  | 428.94   | 610.94    |
| $\text{Mn}_2\text{F}_3\text{I}_3$   | 0.00 | 335.04 | 221.51 | 216.81  | 192.54   | 257.94    |
| $\text{Mn}_2\text{Cl}_3\text{Br}_3$ | 0.00 | 446.40 | 257.06 | 446.08  | 389.98   | 397.44    |
| $\text{Mn}_2\text{Cl}_3\text{I}_3$  | 0.00 | 456.00 | 270.80 | 299.35  | 261.60   | 345.70    |
| $\text{Mn}_2\text{Br}_3\text{I}_3$  | 0.00 | 463.68 | 224.51 | 366.95  | 324.76   | 329.23    |

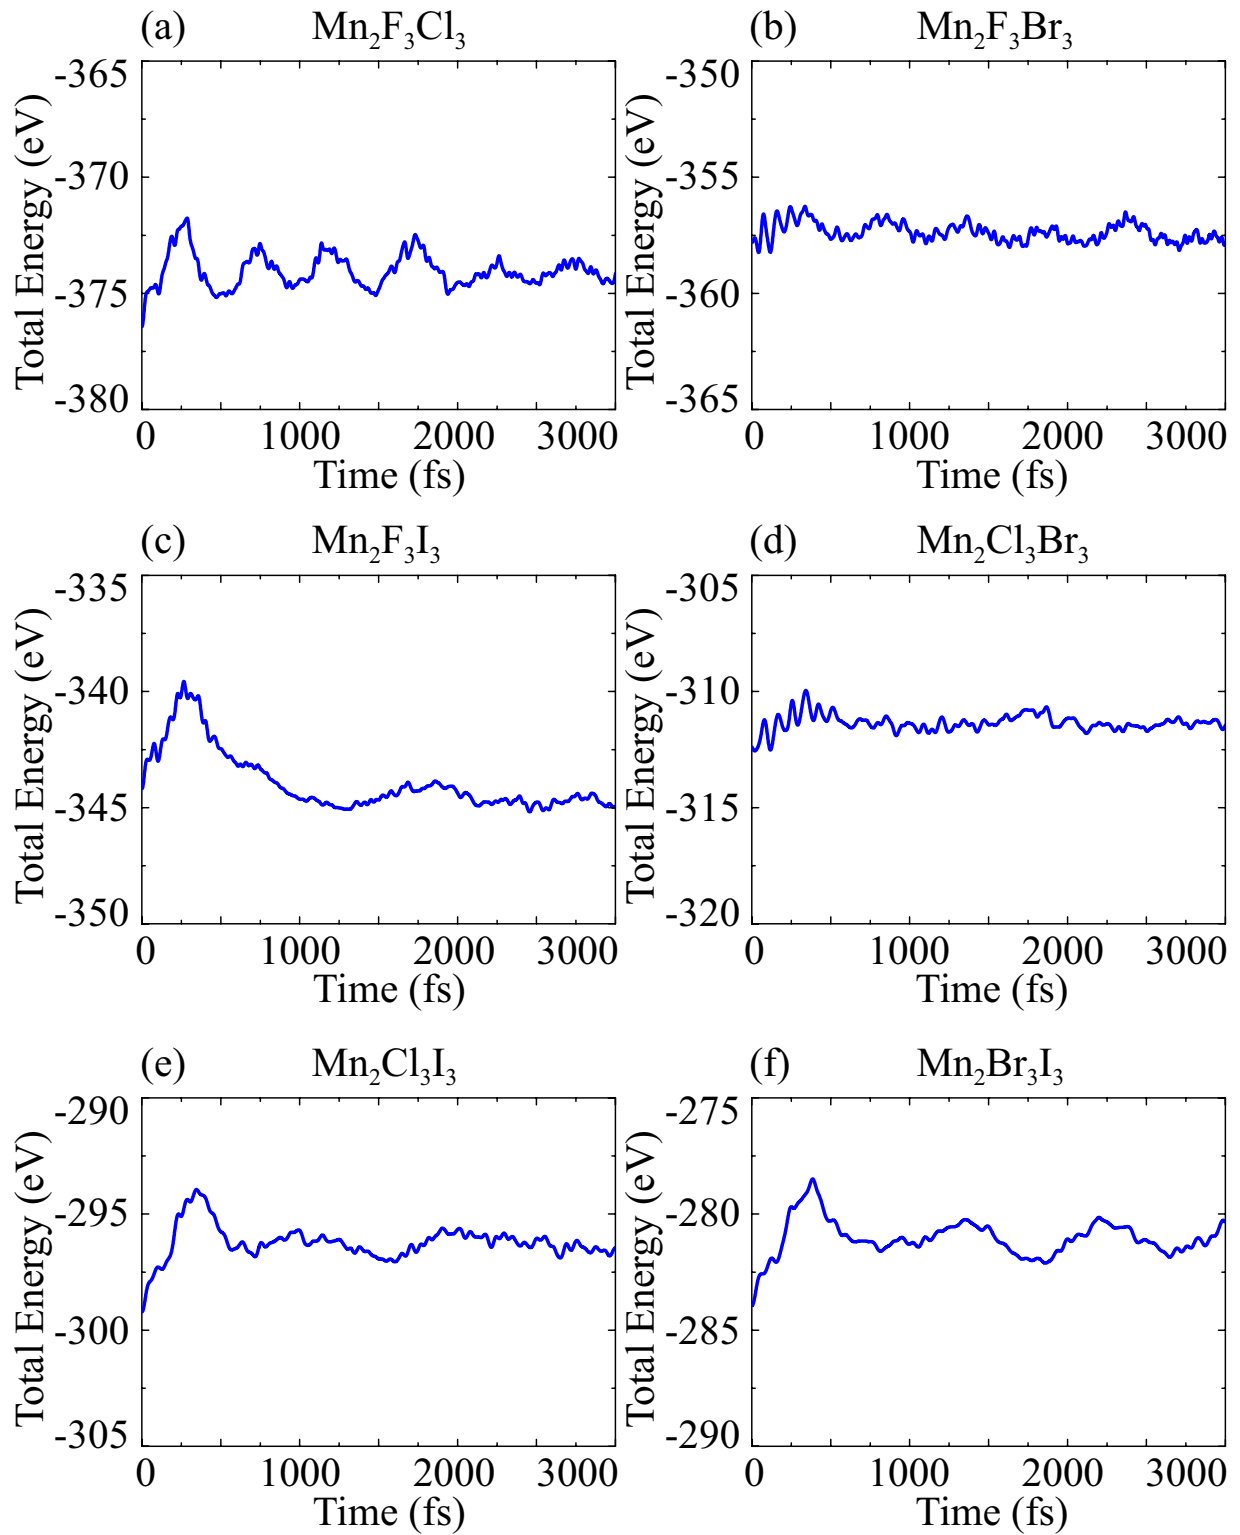

FIG. S1. Total energy fluctuations of the  $\text{Mn}_2\text{X}_3\text{Y}_3$  monolayer during 3 ps MD simulation at 300 K.

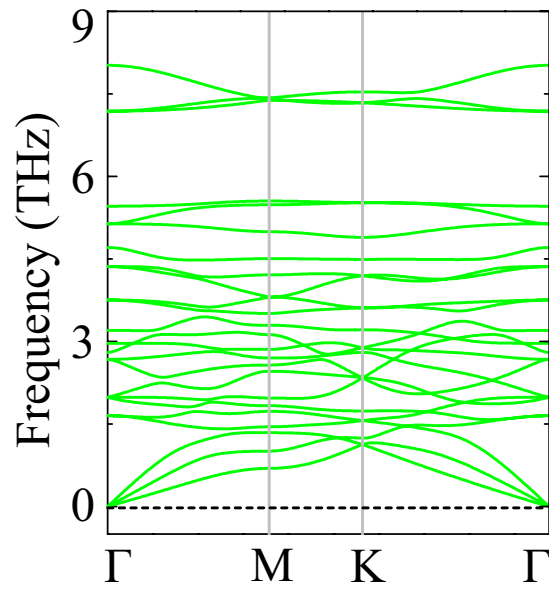

FIG. S2. Phonon dispersion curves of the  $\text{Mn}_2\text{Cl}_3\text{Br}_3$ .

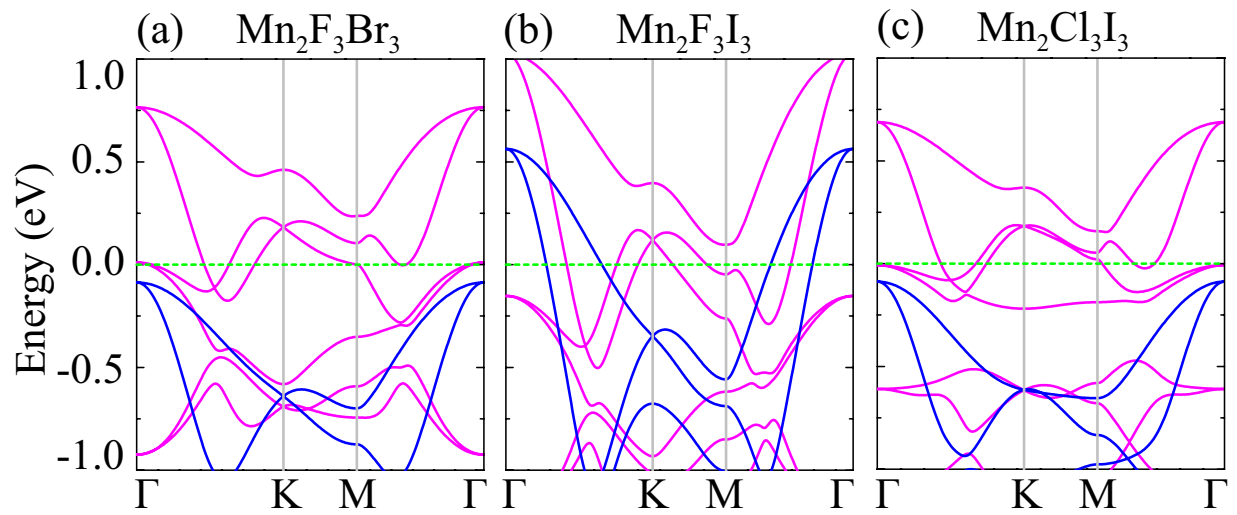

FIG. S3. The calculated spin-polarized band structures of  $\text{Mn}_2\text{F}_3\text{Br}_3$ ,  $\text{Mn}_2\text{F}_3\text{I}_3$ , and  $\text{Mn}_2\text{Cl}_3\text{I}_3$ . Spin up and spin down bands are plotted as magenta and blue curves, respectively.

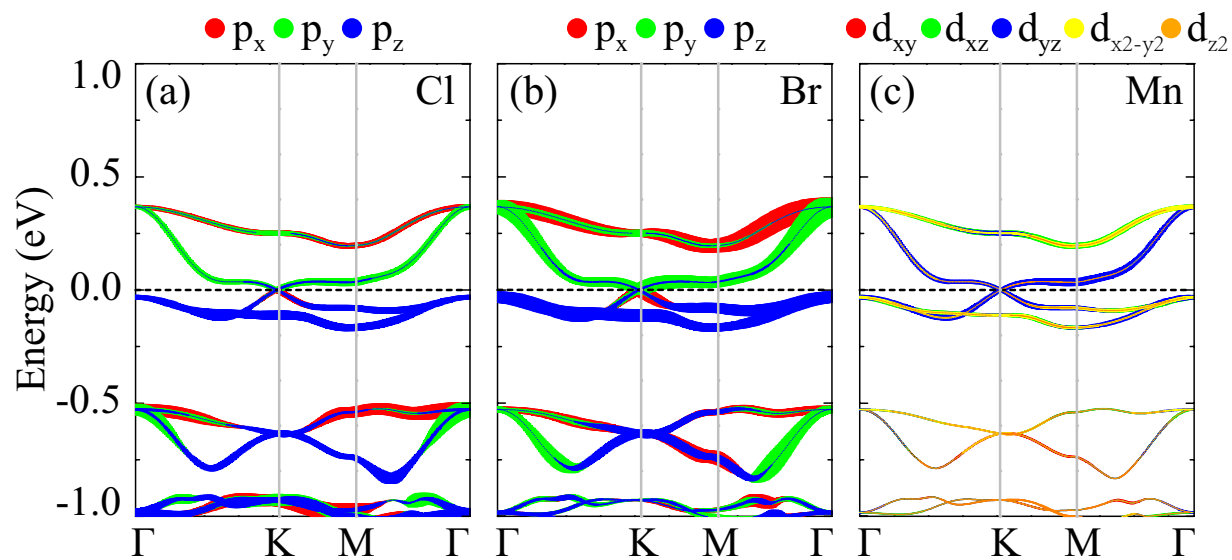

FIG. S4. Energy and k contribution of  $\text{Mn}_2\text{Cl}_3\text{Br}_3$  for Cl p-resolved, Br p-resolved and Mn d-resolved to the spin up bands.
